# Supplementary material for: Human Papillomavirus Infection and Vaccination: Knowledge and Attitudes among Nursing Students in Italy
Source: PubMed Central journal article supplement (PMC6572142; doi:10.3390/ijerph16101770), 2019-05-19
Supplement: ijerph-16-01770-s001.pdf [file ijerph-16-01770-s001.pdf]

## S1. QUESTIONNAIRE

### Section A.

#### Information about your socio-demographic characteristics.

A1. How old were you on your last birthday? \_\_\_\_\_

A2. Sex:  Male  Female

A3. What is your marital status?  married  single  other \_\_\_\_\_

A4. How many people live with you? \_\_\_\_\_

A5. What is the highest degree of education of your father?

A6. What is the highest degree of education of your mother?

A7. What is the occupation of your father? \_\_\_\_\_

A8. What is the occupation of your mother? \_\_\_\_\_

A9. What is your occupation? \_\_\_\_\_

### Section B.

#### Knowledge towards HPV infection and vaccination.

B1. Human papillomavirus (HPV) is a virus that causes a sexually transmitted infection, have you ever heard of it? (more than one answer is possible)

no  yes, from whom?  mass media  degree program in nursing  physicians  internet  
 friends/family  parents  other \_\_\_\_\_

B2. Who can contract HPV infection?  only men  only women  men and women

B3. Which of these diseases are caused by HPV infection?

lung cancer  cervical cancer  penile cancer  bowel cancer  oropharyngeal cancer  
 anal cancer  genital warts  urinary tract infection

B4. What are risk factors for HPV infection?

|                                        | Yes                      | No                       | I don't know             |
|----------------------------------------|--------------------------|--------------------------|--------------------------|
| Unprotected sex with partners          | <input type="checkbox"/> | <input type="checkbox"/> | <input type="checkbox"/> |
| High frequency of sex partner exchange | <input type="checkbox"/> | <input type="checkbox"/> | <input type="checkbox"/> |
| Multiple sexual partners               | <input type="checkbox"/> | <input type="checkbox"/> | <input type="checkbox"/> |
| Sexual intercourse at an early age     | <input type="checkbox"/> | <input type="checkbox"/> | <input type="checkbox"/> |

B5. Can HPV infection be prevented?

|                                          | Yes                      | No                       | I don't know             |
|------------------------------------------|--------------------------|--------------------------|--------------------------|
| Condom use in sexual intercourse         | <input type="checkbox"/> | <input type="checkbox"/> | <input type="checkbox"/> |
| Vaccination                              | <input type="checkbox"/> | <input type="checkbox"/> | <input type="checkbox"/> |
| Late start of complete sexual activity   | <input type="checkbox"/> | <input type="checkbox"/> | <input type="checkbox"/> |
| Late start of incomplete sexual activity | <input type="checkbox"/> | <input type="checkbox"/> | <input type="checkbox"/> |

**B6.** In Italy, vaccines against HPV infection are available, have you ever heard of them? (more than one answer is possible)  no  yes, from whom?  mass media  degree program in nursing  physicians  internet  friends/family  parents  other\_\_\_\_\_

**B7.** Who should get the HPV vaccination?  men  women  men and women  I don't know

**B8.** Indicate, between following diseases, those that can be avoided with HPV vaccination?

lung cancer  cervical cancer  penile cancer  bowel cancer  oropharyngeal cancer  
 anal cancer  genital warts  urinary tract infection  I don't know

### Section C.

#### Attitudes towards HPV infection and vaccination.

**C1.** On a scale from 1 to 10, how much are you worried of contracting HPV infection? (1 not worried; 10 very worried)\_\_\_\_\_

**C2.** On a scale from 1 to 10, how much are you worried of developing diseases caused by HPV? (1 not worried; 10 very worried)\_\_\_\_\_

**C3.** On a scale from 1 to 10, how useful do you believe HPV vaccination in men? (1 not useful; 10 very useful)\_\_\_\_\_

**C4.** On a scale from 1 to 10, how useful do you believe HPV vaccination in women? (1 not useful; 10 very useful) \_\_\_\_\_

**C5.** How safe do you believe HPV vaccination to be? (1 not safe; 10 very safe)\_\_\_\_\_

### Section D

#### Behaviors towards HPV infection and vaccination.

**D1.** Have you been to a physician in the last year?  no (**go to the question D3.**)  yes

**D2.** Did physician tell you about HPV vaccination?  no  yes

**D3.** Did you receive HPV vaccination?  yes (**go to the question D5.**)  no

**D4.** Do you intend to receive HPV vaccination?

if yes, why?\_\_\_\_\_

if no, why?\_\_\_\_\_

**D5.** As future health care operator, do you recommend the HPV vaccine to others?  no  yes

### Section E.

#### Sources of information about HPV vaccination.

**E1.** Do you feel you need more information about HPV vaccination? (more than one answer is possible)

no  yes, from whom?  mass media  degree program in nursing  physicians  internet  
 friends/family  parents  other\_\_\_\_\_
